# Supplementary material for: Metabolomic analysis and mass spectrometry imaging after neonatal stroke and cell therapies in mouse brains
Source: PubMed Central journal article supplement (PMC7736587; doi:10.1038/s41598-020-78930-x), 2020-12-14
Supplement: 41598_2020_78930_MOESM1_ESM.pdf [file 41598_2020_78930_MOESM1_ESM.pdf]

## Principal component analysis

|                           | Negative correlation with PC1 |        |         |                | Positive correlation with PC1 |        |         |                |          |
|---------------------------|-------------------------------|--------|---------|----------------|-------------------------------|--------|---------|----------------|----------|
|                           | KEGG ID                       | PC1    | Factor  | <i>p</i> value | KEGG ID                       | PC1    | Factor  | <i>p</i> value |          |
|                           |                               | vector | loading |                |                               | vector | loading |                |          |
| Isethionic acid           | C05123                        | -0.125 | 0.967   | 1.89E-08       | Ile                           | C00407 | 0.122   | 0.942          | 4.62E-07 |
| Asn                       | C00152                        | -0.125 | 0.965   | 2.43E-08       | Putrescine                    | C00134 | 0.121   | 0.938          | 6.98E-07 |
| N-Acetylaspartic acid     | C01042                        | -0.124 | 0.960   | 5.45E-08       | 2'-Deoxycytidine              | C00881 | 0.121   | 0.935          | 9.16E-07 |
| XA0065                    | No ID                         | -0.123 | 0.955   | 1.14E-07       | Leu                           | C00123 | 0.120   | 0.933          | 1.15E-06 |
| N-Acetylglutamic acid     | C00624                        | -0.122 | 0.942   | 5.08E-07       | Val                           | C00183 | 0.120   | 0.930          | 1.43E-06 |
| N-Acetylneuraminic acid   | C00270                        | -0.121 | 0.938   | 7.43E-07       | Ornithine                     | C00077 | 0.119   | 0.920          | 3.19E-06 |
| Succinic acid             | C00042                        | -0.118 | 0.911   | 5.95E-06       | Lys                           | C00047 | 0.117   | 0.908          | 7.22E-06 |
| Creatine                  | C00300                        | -0.117 | 0.903   | 9.71E-06       | Cystathionine                 | C00542 | 0.117   | 0.907          | 7.62E-06 |
| Glu                       | C00025                        | -0.114 | 0.884   | 2.67E-05       | XC0132                        | No ID  | 0.117   | 0.903          | 9.84E-06 |
| GDP-glucose               | C00394                        | -0.114 | 0.882   | 2.99E-05       | Phe                           | C00079 | 0.115   | 0.894          | 1.65E-05 |
| UDP-glucose               | C00029                        | -0.113 | 0.874   | 4.33E-05       | Pro                           | C00148 | 0.114   | 0.880          | 3.28E-05 |
| Glutathione GSSG_divalent | C00127                        | -0.110 | 0.852   | 1.10E-04       | ADMA                          | C03626 | 0.112   | 0.869          | 5.58E-05 |
| Ethanolamine phosphate    | C00346                        | -0.110 | 0.850   | 1.17E-04       | Betaine                       | C00719 | 0.110   | 0.853          | 1.04E-04 |

|                                       |        |        |       |          |                          |        |       |       |          |
|---------------------------------------|--------|--------|-------|----------|--------------------------|--------|-------|-------|----------|
| CDP-choline                           | C00307 | -0.109 | 0.841 | 1.63E-04 | Guanidoacetic acid       | C00581 | 0.110 | 0.852 | 1.09E-04 |
| NADP                                  | C00006 | -0.108 | 0.837 | 1.86E-04 | Trp                      | C00078 | 0.109 | 0.841 | 1.67E-04 |
| 1-Aminocyclopropane-1-carboxylic acid | C01234 | -0.108 | 0.833 | 2.16E-04 | Citrulline               | C00327 | 0.108 | 0.835 | 2.02E-04 |
| S-Adenosylmethionine                  | C00019 | -0.107 | 0.828 | 2.59E-04 | Arg                      | C00062 | 0.108 | 0.835 | 2.06E-04 |
| UDP-N-acetylgalactosamine             | C00203 | -0.106 | 0.822 | 3.05E-04 | Thr                      | C00188 | 0.107 | 0.829 | 2.44E-04 |
| Saccharopine                          | C00449 | -0.105 | 0.812 | 4.25E-04 | Met                      | C00073 | 0.106 | 0.820 | 3.34E-04 |
| Asp                                   | C00049 | -0.104 | 0.808 | 4.69E-04 | myo-Inositol 1-phosphate | C01177 | 0.106 | 0.818 | 3.52E-04 |
| XA0033                                | No ID  | -0.104 | 0.805 | 5.07E-04 | His                      | C00135 | 0.101 | 0.783 | 9.33E-04 |
| CMP-N-acetylneuraminate               | C00128 | -0.102 | 0.787 | 8.37E-04 | N8-Acetylspermidine      | C01029 | 0.098 | 0.763 | 1.52E-03 |
| Malic acid                            | C00149 | -0.100 | 0.774 | 1.16E-03 | N,N-Dimethylglycine      | C01026 | 0.096 | 0.746 | 2.20E-03 |
| GDP                                   | C00035 | -0.099 | 0.771 | 1.25E-03 | Isobutyrylcarnitine      | No ID  | 0.096 | 0.745 | 2.25E-03 |
| Fumaric acid                          | C00122 | -0.099 | 0.767 | 1.36E-03 | Hypotaurine              | C00519 | 0.096 | 0.741 | 2.45E-03 |
| XA0019                                | No ID  | -0.098 | 0.760 | 1.63E-03 | O-Acetylcarnitine        | C02571 | 0.095 | 0.739 | 2.51E-03 |
| g-Butyrobetaine                       | C01181 | -0.098 | 0.758 | 1.69E-03 |                          |        |       |       |          |
| XC0137                                | No ID  | -0.097 | 0.749 | 2.03E-03 |                          |        |       |       |          |
| AMP                                   | C00020 | -0.096 | 0.746 | 2.20E-03 |                          |        |       |       |          |
| Pyridoxamine 5'-phosphate             | C00647 | -0.096 | 0.743 | 2.33E-03 |                          |        |       |       |          |

|                                 |        |        |       |          |
|---------------------------------|--------|--------|-------|----------|
| N-Acetylglucosamine 1-phosphate | C04256 | -0.096 | 0.742 | 2.40E-03 |
|---------------------------------|--------|--------|-------|----------|

|                   |        |        |       |          |
|-------------------|--------|--------|-------|----------|
| Phosphorylcholine | C00588 | -0.092 | 0.715 | 4.06E-03 |
|-------------------|--------|--------|-------|----------|

---
